# Supplementary material for: Piezoelectric harvesting of mechanical energy for redox chemistry
Source: Royal Society of Chemistry journal article supplement (doi:10.1039/d2fd00084a), 2022-07-15
Supplement: d2fd00084a2.pdf [file d2fd00084a2.pdf]

# Electronic Supplementary Information for Piezoelectric Harvesting of Mechanical Energy for Redox Chemistry

Elan M. Marrero<sup>a</sup>, Christian J. Caprara<sup>a</sup>, Colin N. Gilbert<sup>a</sup>, Emma E.  
5 Blanco<sup>a</sup>, Richard G. Blair<sup>a,b\*</sup>

a. Florida Space Institute, University of Central Florida, Orlando, FL 32826 USA

b. Renewable Energy and Chemical Transformations Cluster (REACT), University of  
Central Florida, Orlando, FL 32816 USA.

† E-mail: Richard.Blair@ucf.edu; Tel: +1-407-823-0639

10

DOI: 10.1039/b000000x [DO NOT ALTER/DELETE THIS TEXT]

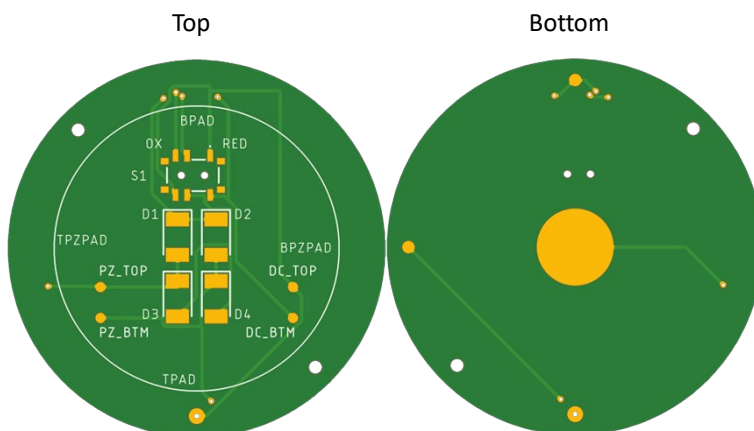

**Figure S1.** The pad layout for the board containing the full wave bridge rectifier and selector switch.

15

20

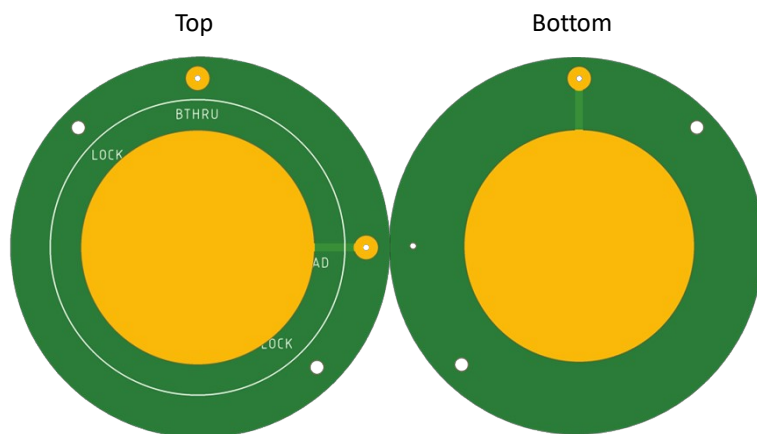

**Figure S2.** The pad layout for the board contacting the strike plate and the PVDF film.

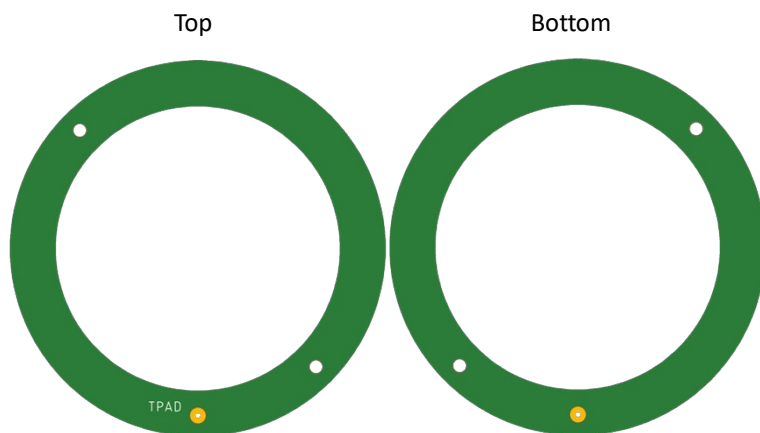

**Figure S3.** The pad layout for the board contacting the vial screw cap.

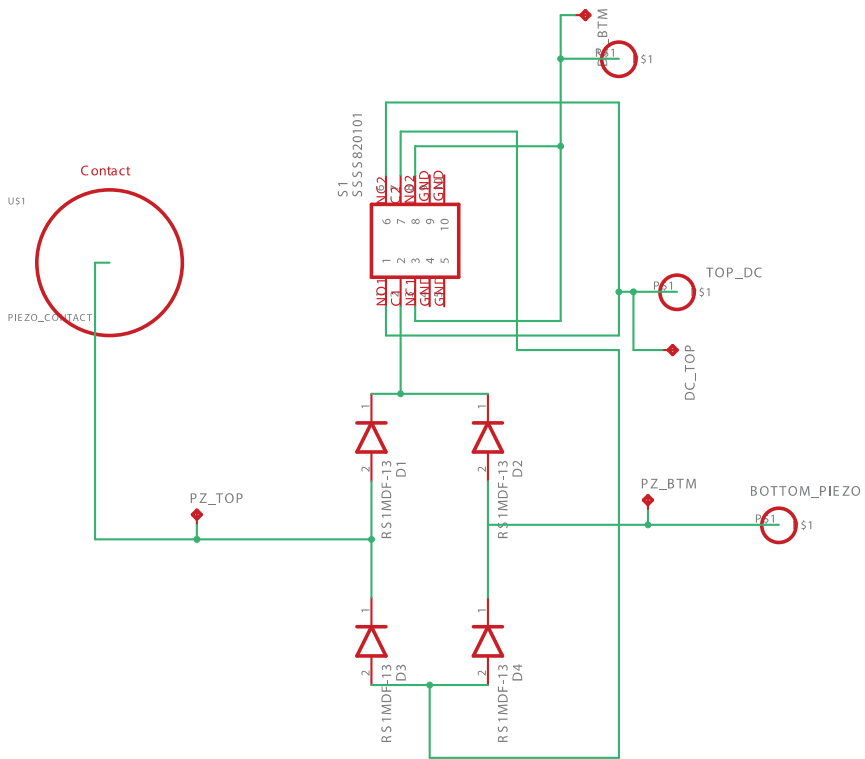

**Figure S4.** The circuit diagram for the full wave bridge rectifier circuit with polarity selection.

5

10
